# Supplementary material for: MLL5 suppresses antiviral innate immune response by facilitating STUB1-mediated RIG-I degradation
Source: PubMed Central journal article supplement (PMC5871759; doi:10.1038/s41467-018-03563-8), 2018-03-28
Supplement: 41467_2018_3563_MOESM1_ESM.pdf [file 41467_2018_3563_MOESM1_ESM.pdf]

1 **MLL5 suppresses antiviral innate immune response by facilitating**

2 **STUB1-mediated RIG-I degradation**

3

4 Zhou et al.

5

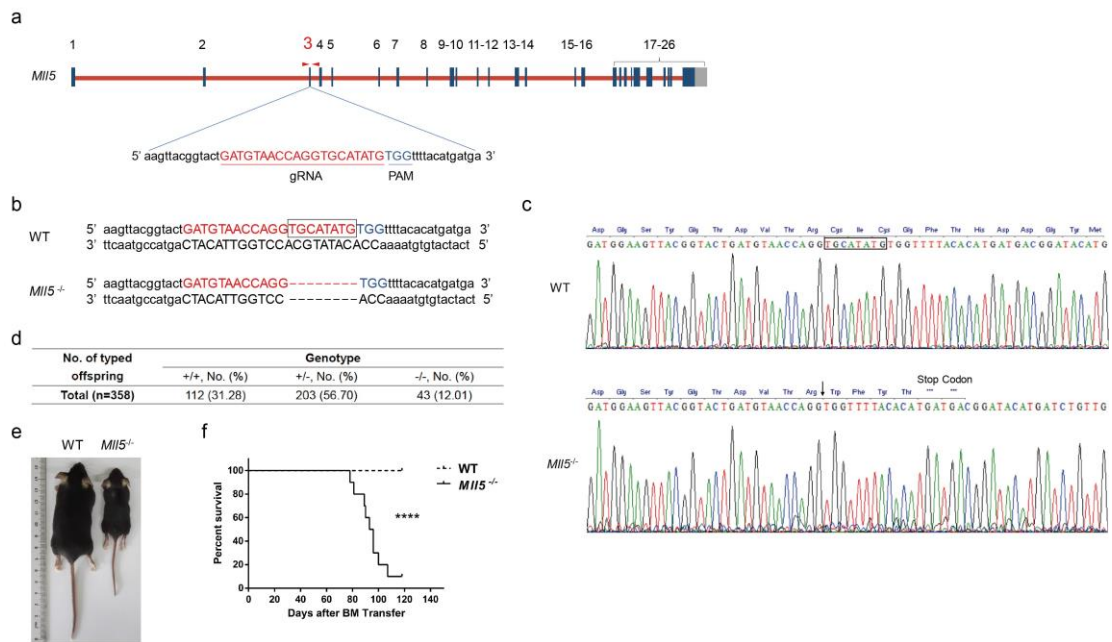

6

7 **Supplementary Figure 1. Generation of *Mli5*-deficient mice with CRISPR-Cas9**

8 approach. **(a)** Graphic representation of strategy used to generate *Mli5*<sup>-/-</sup> mice. gRNA

9 (red) and PAM (blue) sequences locus in exon 3 of *Mli5* gene. **(b)** DNA sequence of

10 WT (upper) and *Mli5*<sup>-/-</sup> mice (bottom). The region of the target sequence is shown in

11 red. The black box indicates the nucleotides lost in *Mli5*<sup>-/-</sup> mice. **(c)** Sequence analysis

12 of the the Reverse Transcription-PCR band in MEFs from WT (upper) and *Mli5*<sup>-/-</sup>

13 mice (bottom). The nucleotide sequence confirms the reading frame shift in exon 3 in

14 *Mli5*<sup>-/-</sup> mice; a premature stop codon (TGA) in exon 3 is induced. **(d)** Number and

15 frequency of WT, *Mli5*<sup>+/-</sup> and *Mli5*<sup>-/-</sup> pups by *Mli5*<sup>+/-</sup> intercrosses at the time of

16 weaning. **(e)** Postnatal growth retardation in *Mli5*-deficient mice; one pair of 6-week-

17 old WT and *Mli5*<sup>-/-</sup> male littermates. **(f)** Survival curves of lethally irradiated

18 recipients transplanted with WT and *Mli5*<sup>-/-</sup> BM (n=10). Data were analyzed by log-

19 rank (Mantel-Cox) test. (\*\*\*\* p<0.0001).

20

21

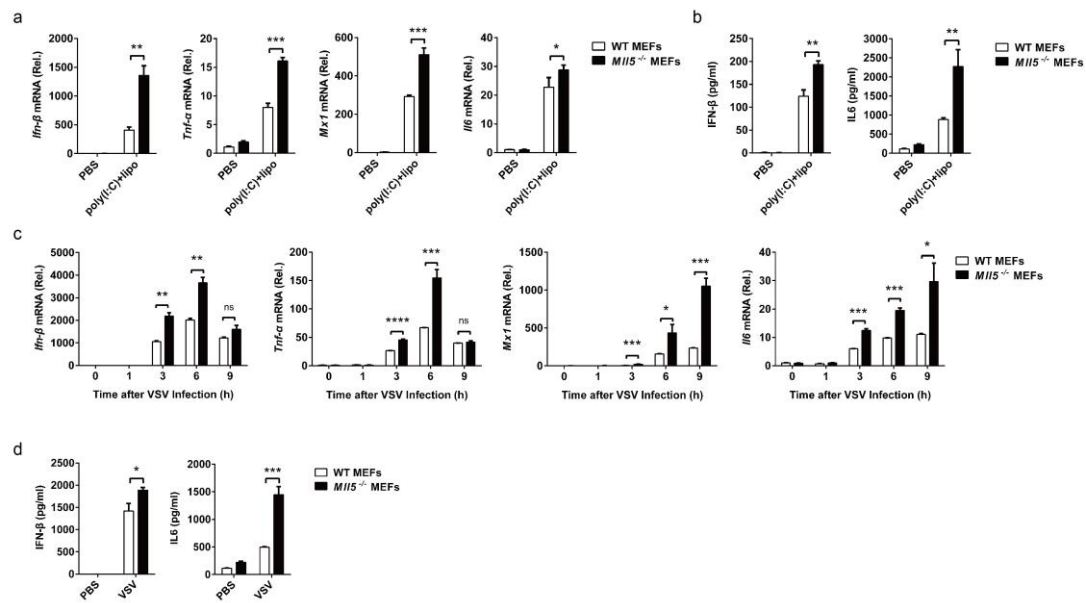

22

23 **Supplementary Figure 2.** MLL5 selectively suppresses RLR-mediated antiviral  
 24 innate immune response in mouse embryonic fibroblasts. **(a)** Expression of *Ifn-β*,  
 25 *Tnf-α*, *Mx1* and *Il6* mRNA in MEFs from WT or *Mll5*<sup>-/-</sup> mice stimulated with  
 26 intracellular poly(I:C) (1 μg/ml) for 6 h. *Gapdh* served as a control. **(b)** ELISA  
 27 quantification of IFN-β and IL-6 secretion in MEFs treated as in **a**. **(c)** Expression of  
 28 *Ifn-β*, *Tnf-α*, *Mx1* and *Il6* mRNA in MEFs from WT or *Mll5*<sup>-/-</sup> mice infected with  
 29 VSV-GFP (MOI:1) . *Gapdh* served as a control. **(d)** ELISA quantification of IFN-β  
 30 and IL-6 secretion in MEFs from WT or *Mll5*<sup>-/-</sup> mice infected with VSV-GFP  
 31 (MOI:1) for 6 h. Data were from three independent experiments and were analyzed  
 32 with the Student's *t*-test (two-tailed) and were presented as mean ± SD. (\* *p*<0.05,  
 33 \*\* *p*<0.01, \*\*\* *p*<0.001, \*\*\*\* *p*<0.0001).

34

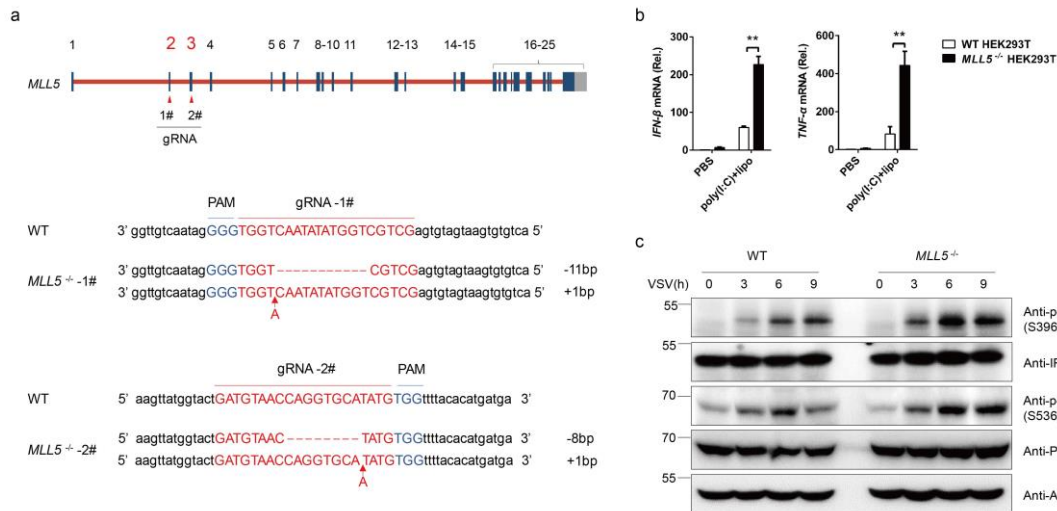

35

36 **Supplementary Figure 3.** MLL5 suppresses RLR-mediated immune response in  
 37 HEK293T cells. **(a)** Graphic representation of strategy used to generate *MLL5*<sup>-/-</sup>  
 38 HEK293T cells (upper) and DNA sequence of *MLL5*<sup>-/-</sup> HEK293T cells (bottom).  
 39 gRNA (red) and PAM (blue) sequences locus in exon 2 and 3 of *MLL5* gene. The  
 40 column on the right indicates the number of inserted or deleted bases. **(b)** Expression  
 41 of *IFN-β* and *TNF-α* mRNA in WT and *MLL5*<sup>-/-</sup> (2#) HEK293T cells stimulated with  
 42 intracellular poly(I:C) (1 μg/ml) for 6 h. *GAPDH* served as a control. **(c)** Immunoblot  
 43 analysis of p-IRF3 and P65 in WT and *MLL5*<sup>-/-</sup> (2#) HEK293T cells upon infection  
 44 with VSV-GFP (MOI:1) for indicated times. Actin served as a loading control. Data  
 45 were representative of three independent experiments with similar results **(c)** or were  
 46 from three independent experiments **(b)** and were analyzed with the Student's *t*-test  
 47 (two-tailed) and were presented as mean ± SD. (\*\* p < 0.01).

48

49

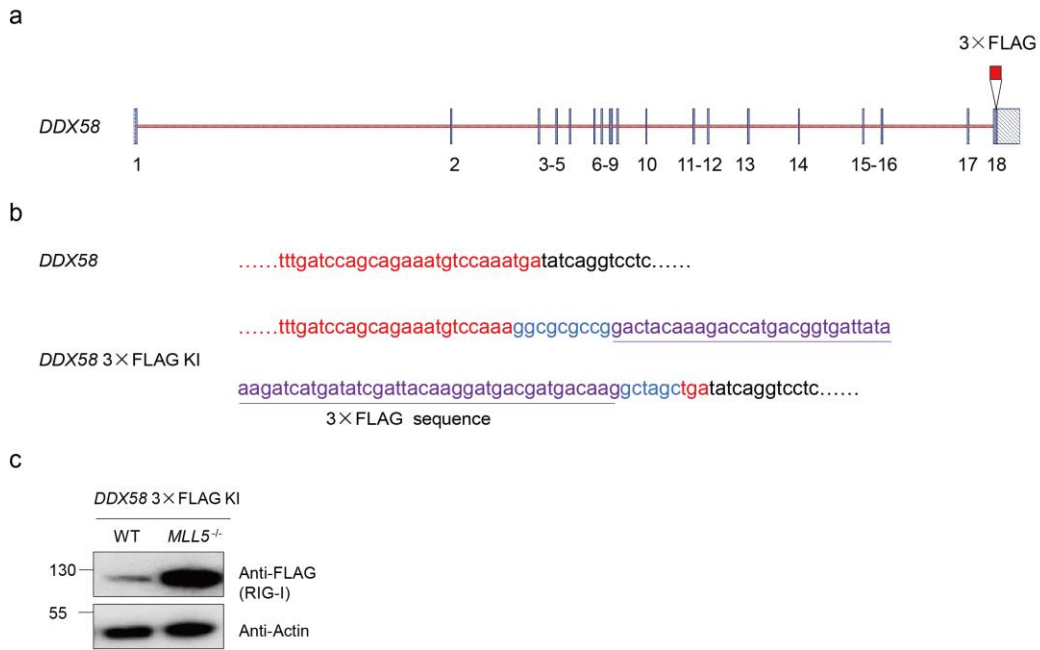

50

51 **Supplementary Figure 4.** Generation of FLAG-tagged endogenous RIG-I protein in  
 52 HEK293T cells. **(a)** Schematic of 3xFLAG coding sequence insertion in *DDX58*  
 53 gene in WT and *MLL5*<sup>-/-</sup> HEK293T cells. **(b)** DNA sequence around the stop codon  
 54 (tga, red letters) of *DDX58* gene in WT cells (upper) and the 3xFLAG knock-in cells  
 55 (bottom). Purple indicates the 66-bps 3xFLAG coding sequence. Red indicates the  
 56 coding sequence of *DDX58*. Blue indicates the restriction enzyme cutting sites. **(c)**  
 57 Immunoblot analysis of FLAG-tagged RIG-I in the *DDX58* 3xFLAG knock-in WT  
 58 and *MLL5*<sup>-/-</sup> HEK293T cells. Actin served as a loading control. Data are representative  
 59 of three independent experiments with similar results.

60

61

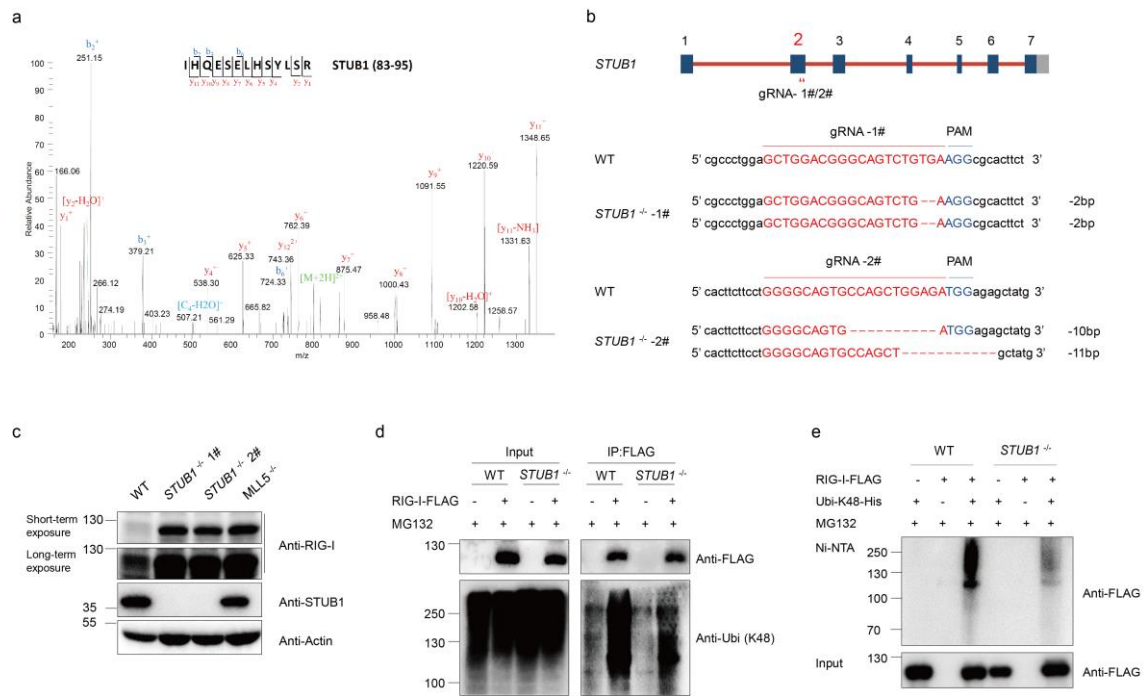

62

63 **Supplementary Figure 5.** Identification of STUB1 as the E3 ligase of RIG-I. **(a)**

64 STUB1 in RIG-I-interacting proteins identified by mass spectrometry. **(b)** Graphic

65 representation of strategy used to generate *STUB1*<sup>-/-</sup> HEK293T cells (upper) and DNA

66 sequence of *STUB1*<sup>-/-</sup> HEK293T cells (bottom). gRNA (red) and PAM (blue)

67 sequences locus in exon 2 of *STUB1* gene. The column on the right indicates the

68 number of inserted or deleted bases. **(c)** Immunoblot analysis of RIG-I and STUB1 in

69 the WT and *STUB1*<sup>-/-</sup> HEK293T cells. Actin served as a loading control. **(d)** Co-

70 immunoprecipitation and immunoblot analysis of K48-linked polyubiquitination of

71 RIG-I in WT and *STUB1*<sup>-/-</sup> (1#) HEK293T cells transfected with RIG-I-FLAG and

72 treated with MG132 (5 μM) for 12 h before. **(e)** His-pull down and immunoblot

73 analysis of K48-linked polyubiquitination of RIG-I in WT and *STUB1*<sup>-/-</sup> (1#)

74 HEK293T cells cotransfected with RIG-I-FLAG and mutant ubiquitin K48-ubi-His

75 and treated with MG132 (5 μM) for 12 h. Data are representative of three independent

76 experiments with similar results.

77

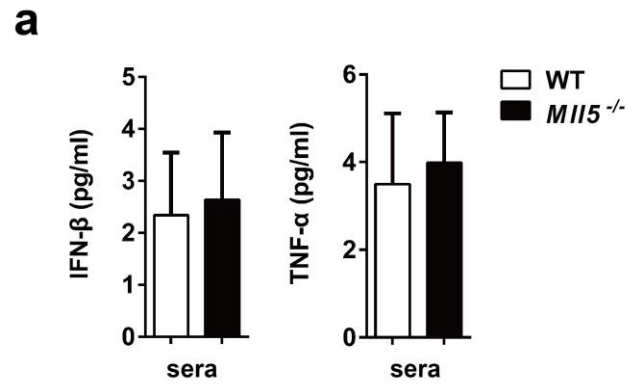

78

79 **Supplementary Figure 6.** ELISA quantification of IFN-β and TNF-α in sera in 6-9  
80 weeks old WT or *MI15*<sup>-/-</sup> littermates (n=3).

81

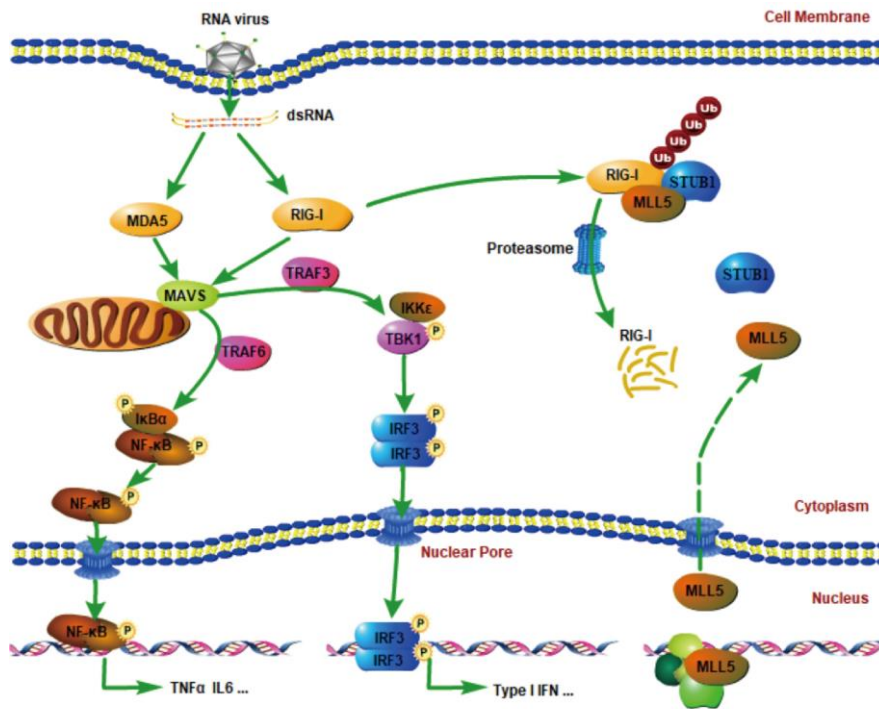

82

83 **Supplementary Figure 7.** Working model. A small fraction of MLL5 proteins  
 84 located in the cytoplasm facilitated interaction between RIG-I and its E3 ligase  
 85 STUB1 and promoted K48-linked polyubiquitination and proteasome degradation of  
 86 RIG-I. MLL5 translocate from the nucleus to the cytoplasm in responses to RNA  
 87 virus infection, thereby promoting degradation of RIG-I through E3 ubiquitin ligase  
 88 STUB1.

89



90

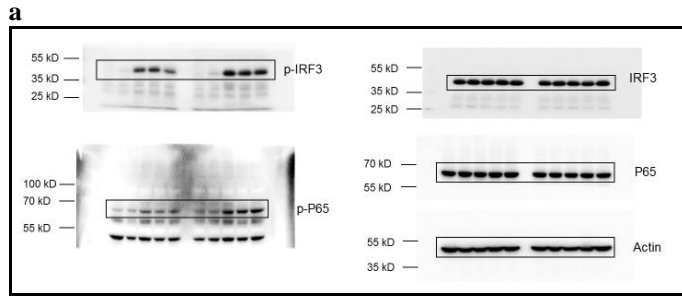

91

92

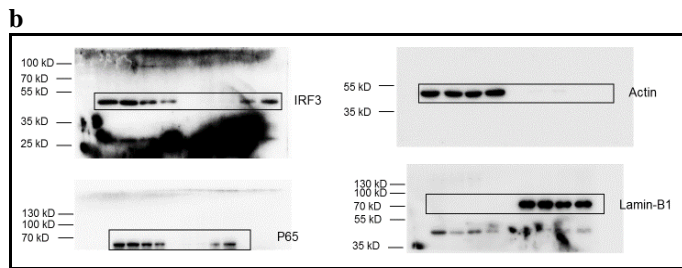

93

94

95

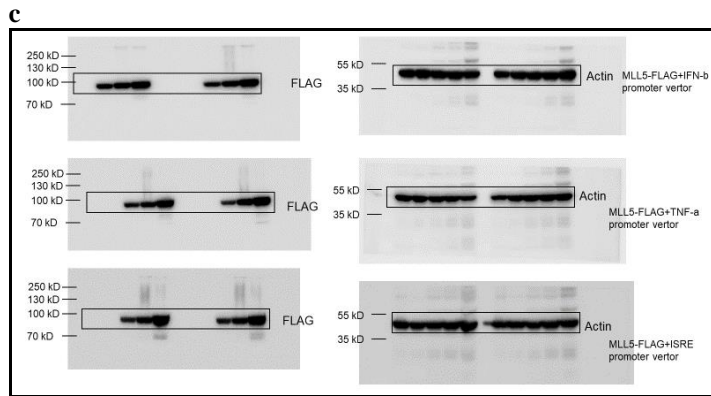

96

97

98

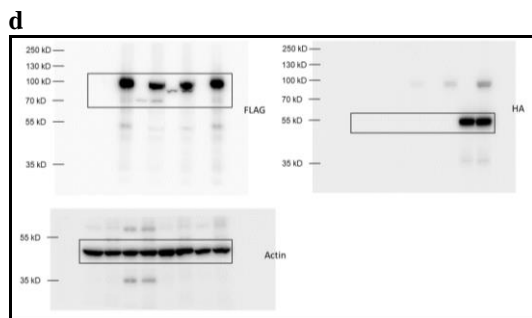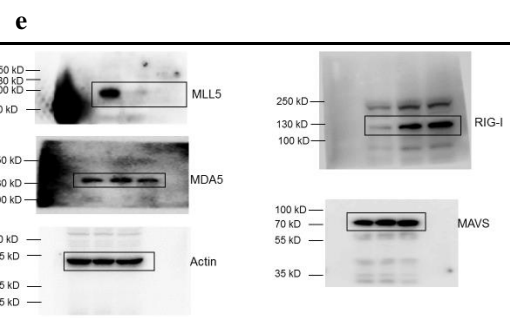

99

100

101

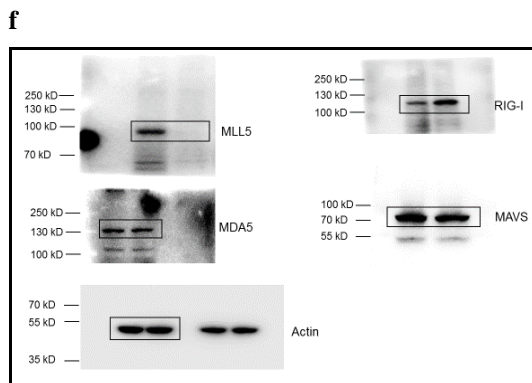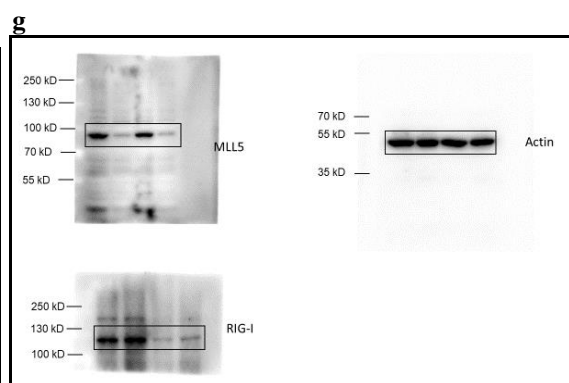

102

103

104

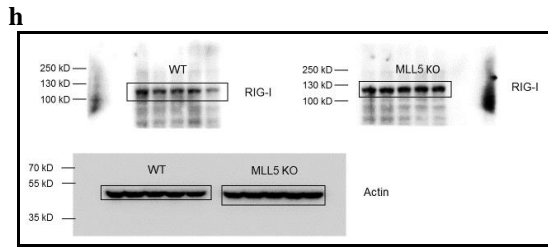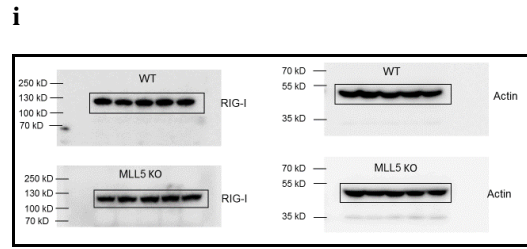

105

106

107

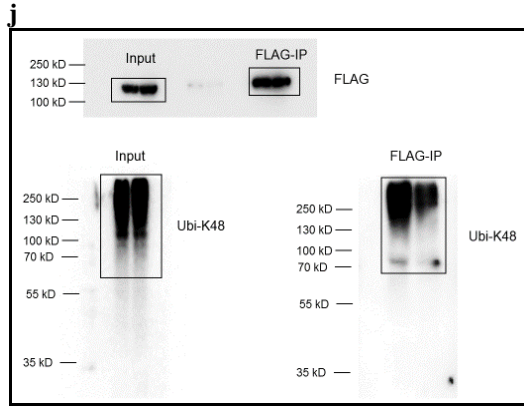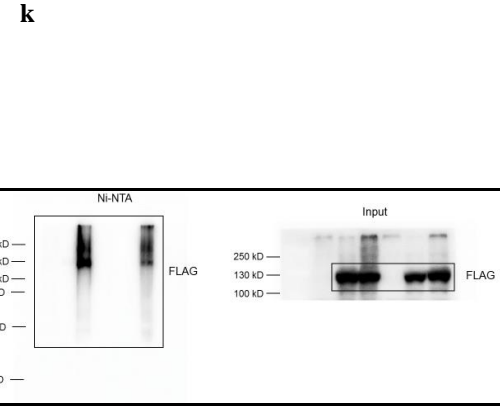

108

109

110

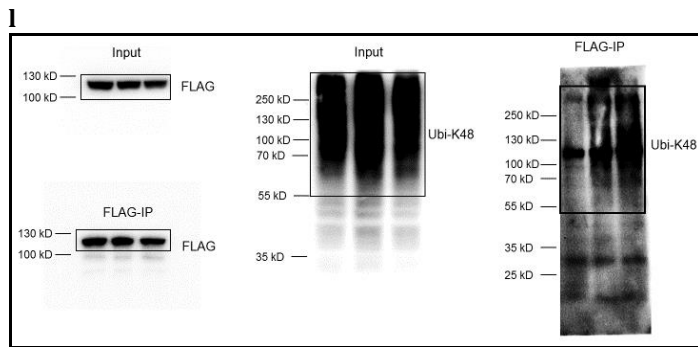

111

112

113

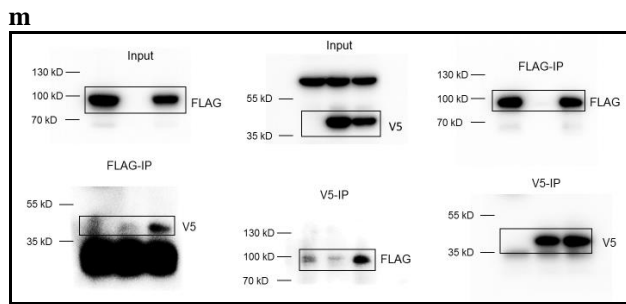

114

115

116

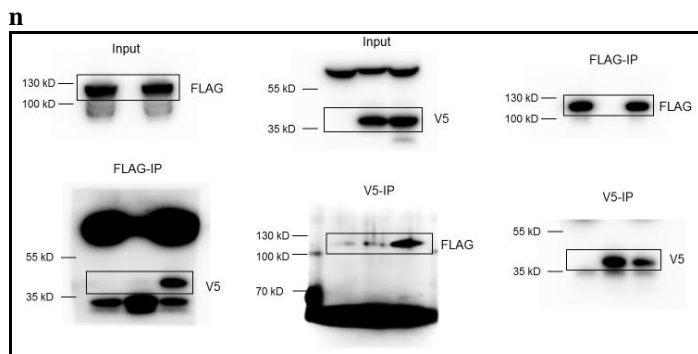

117

118

119

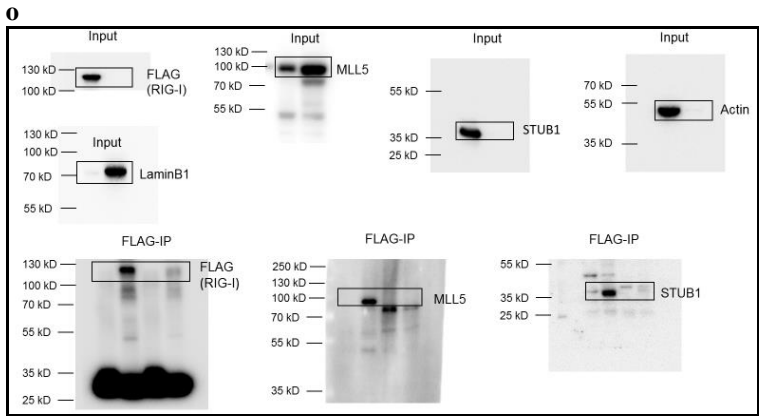

120

121

122

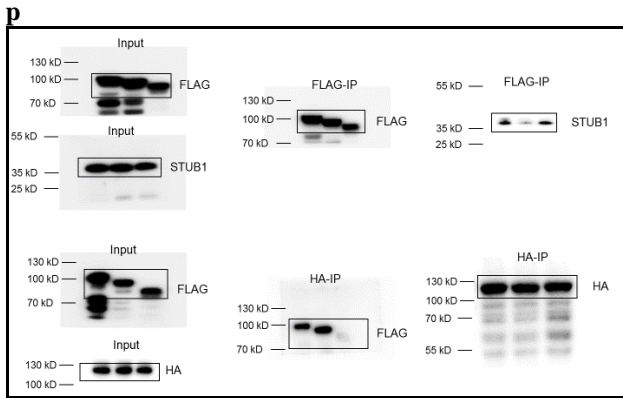

123

124

125

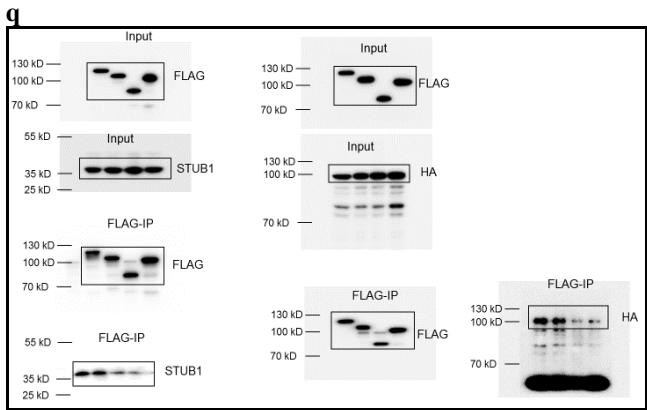

126

127

128

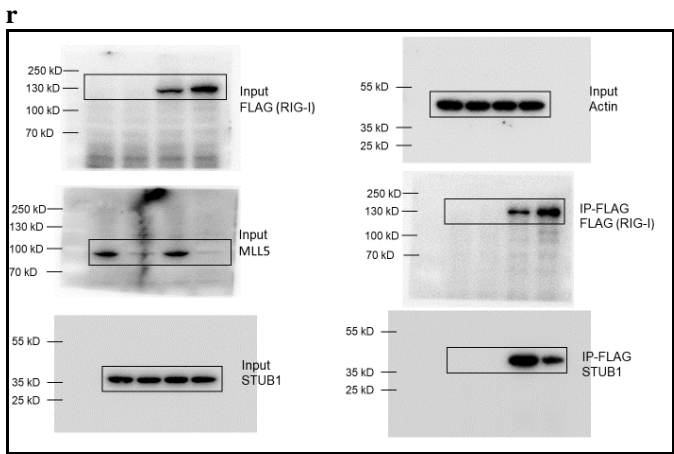

129

130

131

s

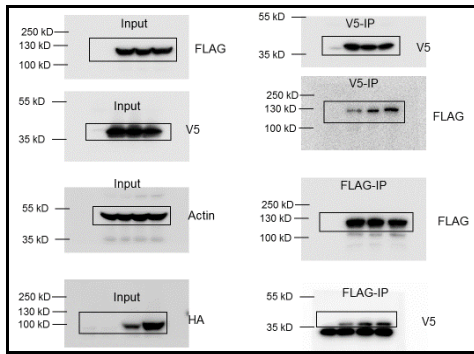

t

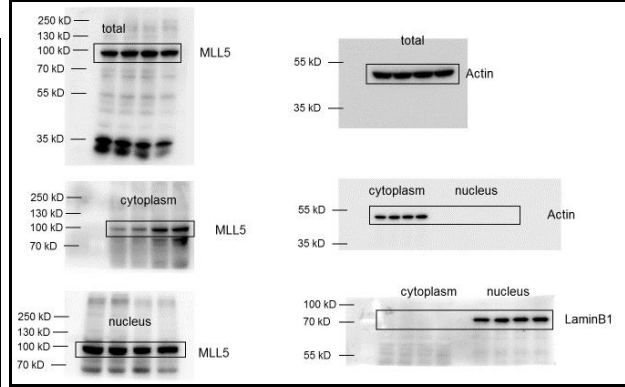

132

133

134

u

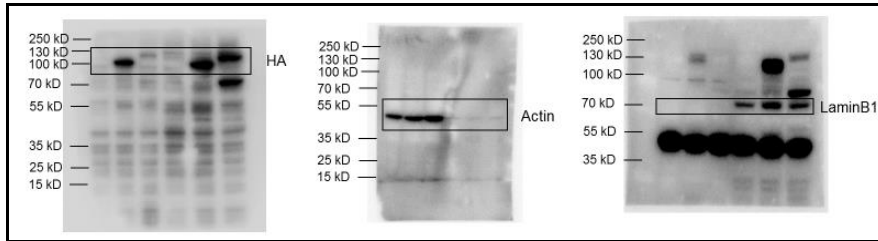

135

136

137

v

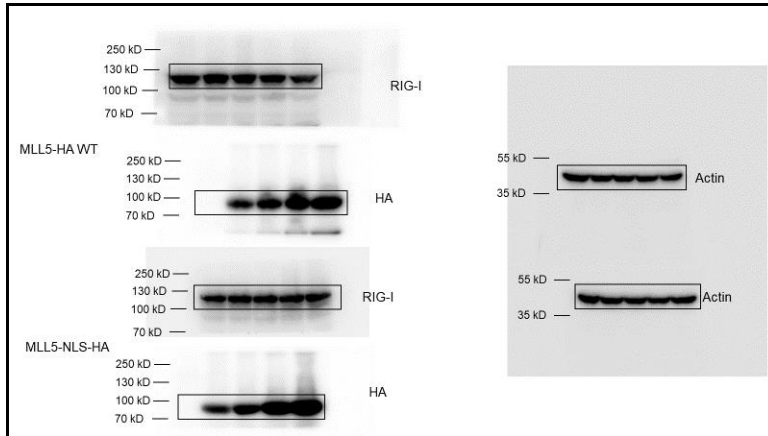

138

139

140

w

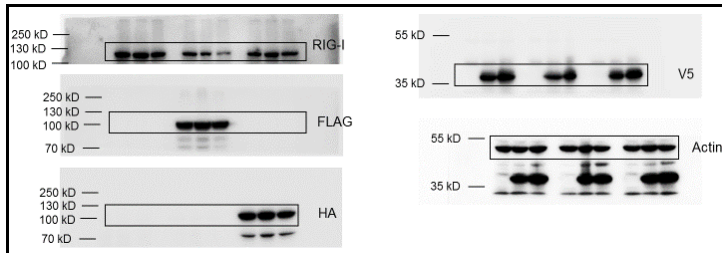

141

142

143

144

145

146

147

148

**Supplementary Figure 8.** Uncropped dcans of the western blots related to main figures. (a-c) related to Figure 2 a-c, (d-g) related to Figure 4 a-d, (h-l) related to Figure 4 g-k, (m-o) related to Figure 5 a-c, (p-q) related to Figure 5 e and f, (r-s) related to Figure 6 a and b, (t-w) related to Figure 7 a, c, e and f.

149

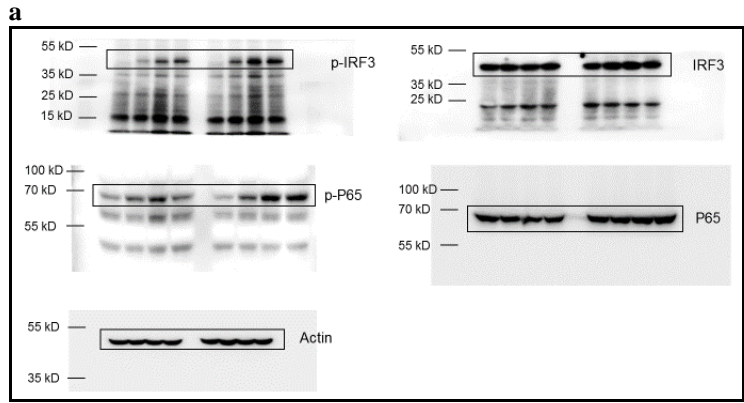

150

151

152

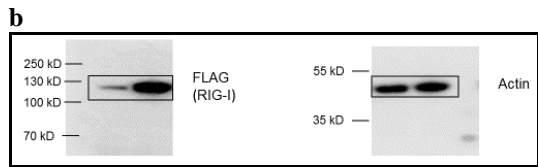

153

154

155

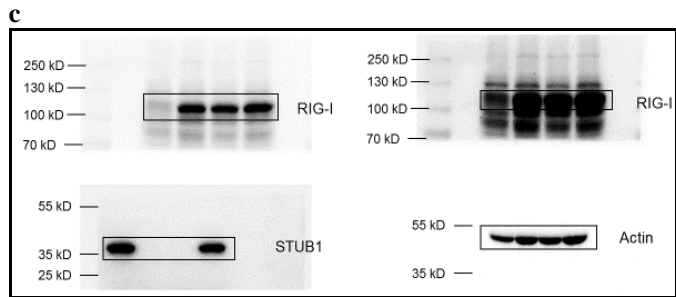

156

157

158

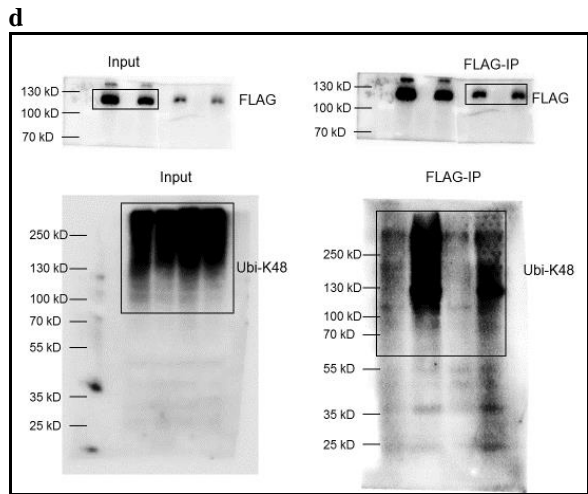

159

160

161

162

163

164

**e**

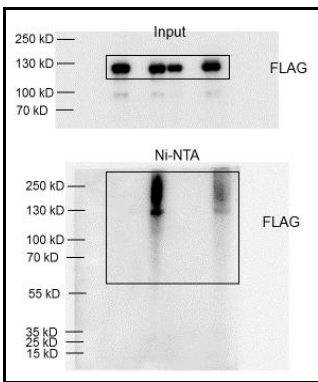

**Supplementary Figure 9.** Uncropped dcans of the western blots related to Supplementary Figures. **(a)** related to Supplementary Figure 3 c, **(b)** related to Supplementary Figure 4 c, **(c-e)** related to Supplementary Figure 5 d-f.

165 **Supplementary Table 1.** Relative band densities indicating RIG-I protein levels in  
166 WT and *MLL5*<sup>-/-</sup> HEK293T cells treated with CHX (100 µg/ml).

|                            |     |      |      |      |      |
|----------------------------|-----|------|------|------|------|
| Time                       | 0h  | 15h  | 20h  | 25h  | 30h  |
| WT                         | 1.0 | 0.90 | 0.68 | 0.69 | 0.60 |
| <i>MLL5</i> <sup>-/-</sup> | 1.0 | 0.98 | 1.02 | 1.05 | 1.0  |
| Time                       | 0h  | 6h   | 12h  | 18h  | 24h  |
| WT                         | 1.0 | 0.95 | 0.68 | 0.48 | 0.47 |
| <i>MLL5</i> <sup>-/-</sup> | 1.0 | 1.02 | 0.94 | 0.86 | 0.88 |

167 Actin served as a loading control. Band density indicating protein amount was  
168 quantified using Image J software.

169

170 **Supplementary Table 2.** Candidates RIG-I-interacting proteins identified by mass  
171 spectrometry.

| <b>seq count</b> | <b>gene name</b> |
|------------------|------------------|
| 703              | DDX58            |
| 91               | HUWE1            |
| 34               | MLL5             |
| 41               | TRIM28           |
| 40               | HECTD1           |
| 29               | HERC5            |
| 25               | RNF135           |
| 20               | TRIM21           |
| 13               | TRIM25           |
| 9                | UBR5             |
| 7                | ECM29            |
| 6                | MUL1             |
| 4                | HUWE1            |
| 3                | RNF138           |
| 4                | HERC1            |
| 4                | STUB1            |
| 3                | MARCH7           |
| 3                | XIAP             |
| 3                | UBL4A            |
| 3                | UFL1             |
| 2                | KCMF1            |
| 2                | DTX3L            |
| 2                | RNF187           |
| 2                | TRIM26           |
| 2                | RANBP2           |
| 2                | CBX4             |

172

173

174 **Supplementary Table 3.** Relative band densities indicating MLL5 protein levels in  
175 the nuclear and cytoplasmic fractions in WT HEK293T cells infected with VSV-GFP  
176 (MOI:1).

| Time (VSV-GFP) | 0h  | 5h   | 10h  | 15h  |
|----------------|-----|------|------|------|
| Cytoplasm      | 1.0 | 1.19 | 1.65 | 1.70 |
| Nucleus        | 1.0 | 0.96 | 0.83 | 0.85 |
| Time (VSV-GFP) | 0h  | 4h   | 8h   |      |
| Cytoplasm      | 1.0 | 1.10 | 1.62 |      |
| Nucleus        | 1.0 | 0.95 | 0.87 |      |

177 Actin served as a cytoplasmic control. Lamin B1 served as a nuclear protein control.

178 Band density indicating protein amount was quantified using Image J software.

179

180



181 **Supplementary Table 4.** Relative band densities indicating RIG-I protein levels in  
182 *MLL5*<sup>-/-</sup> HEK293T cells transfected with different amount of MLL5-HA or MLL5-  
183 NLS-HA plasmids (0, 300, 600, 1000 and 2000 ng).

| Amount of Plasmids | 0   | 300ng | 600ng | 1000ng | 2000ng |
|--------------------|-----|-------|-------|--------|--------|
| MLL5-HA            | 1.0 | 0.46  | 0.46  | 0.49   | 0.37   |
|                    | 1.0 | 0.85  | 0.80  | 0.76   | 0.75   |
| MLL5-HA-NLS        | 1.0 | 1.22  | 1.16  | 1.02   | 0.93   |
|                    | 1.0 | 1.04  | 1.08  | 1.02   | 1.0    |

184 Actin served as a loading control. Band density indicating protein amount was  
185 quantified using Image J software.
